# Supplementary material for: Cytotoxicity and cell cycle arrest induced by andrographolide lead to programmed cell death of MDA-MB-231 breast cancer cell line
Source: PubMed Central journal article supplement (PMC4833932; doi:10.1186/s12929-016-0257-0), 2016-04-16
Supplement: 12929_2016_257_MOESM1_ESM.pdf [file 12929_2016_257_MOESM1_ESM.pdf]

## Additional File 1

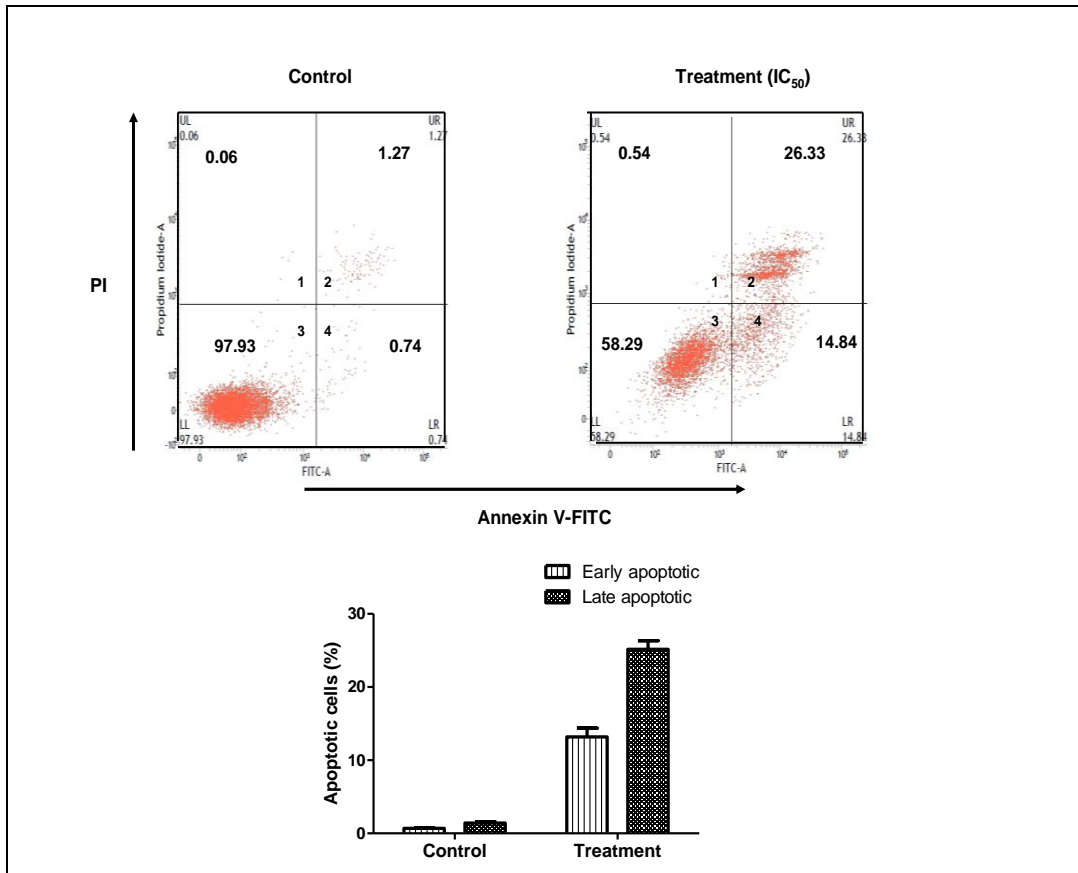

**Figure S1.** Effect of andrographolide treatment on apoptosis in MCF-7 cells. Cells were treated with IC<sub>50</sub> concentration of andrographolide for 48 h, double stained with annexin V-FITC/ PI and analyzed in a FACSVerse™ (Becton Dickinson, USA) flow cytometer. The percentage Annexin V-positive population refers apoptosis induction (region 2 and 4). Data are representative of three independent experiments.
